# Supplementary material
Source: PubMed Central journal article supplement (PMC7042489)
Supplement: mmc2.pdf [file mmc2.pdf]

# Loss-of-Function Variants in *PPP1R12A*: From Isolated Sex Reversal to Holoprosencephaly Spectrum and Urogenital Malformations

Joel J. Hughes,<sup>1,22</sup> Ebba Alkhunaizi,<sup>2,3,22</sup> Paul Kruszka,<sup>1,\*</sup> Louise C. Pyle,<sup>4</sup> Dorothy K. Grange,<sup>5</sup> Seth I. Berger,<sup>1,6,7</sup> Katelyn K. Payne,<sup>8</sup> Diane Masser-Frye,<sup>9</sup> Tommy Hu,<sup>1</sup> Michelle R. Christie,<sup>10</sup> Nancy J. Clegg,<sup>10</sup> Joshua L. Everson,<sup>11,12</sup> Ariel F. Martinez,<sup>1</sup> Laurence E. Walsh,<sup>8</sup> Emma Bedoukian,<sup>4</sup> Marilyn C. Jones,<sup>9</sup> Catharine Jean Harris,<sup>13</sup> Korbinian M. Riedhammer,<sup>14,15</sup> Daniela Choukair,<sup>16</sup> Patricia Y. Fechner,<sup>17</sup> Meilan M. Rutter,<sup>18</sup> Sophia B. Hufnagel,<sup>19,21</sup> Maian Roifman,<sup>2,3</sup> Gad B. Kletter,<sup>20</sup> Emmanuele Delot,<sup>6,7</sup> Eric Vilain,<sup>6,7</sup> Robert J. Lipinski,<sup>11,12</sup> Chad M. Vezina,<sup>11,12</sup> Maximilian Muenke,<sup>1</sup> and David Chitayat<sup>2,3</sup>

In two independent ongoing next-generation sequencing projects for individuals with holoprosencephaly and individuals with disorders of sex development, and through international research collaboration, we identified twelve individuals with *de novo* loss-of-function (LoF) variants in protein phosphatase 1, regulatory subunit 12a (*PPP1R12A*), an important developmental gene involved in cell migration, adhesion, and morphogenesis. This gene has not been previously reported in association with human disease, and it has intolerance to LoF as illustrated by a very low observed-to-expected ratio of LoF variants in gnomAD. Of the twelve individuals, midline brain malformations were found in five, urogenital anomalies in nine, and a combination of both phenotypes in two. Other congenital anomalies identified included omphalocele, jejunal, and ileal atresia with aberrant mesenteric blood supply, and syndactyly. Six individuals had stop gain variants, five had a deletion or duplication resulting in a frameshift, and one had a canonical splice acceptor site loss. Murine and human *in situ* hybridization and immunostaining revealed *PPP1R12A* expression in the prosencephalic neural folds and protein localization in the lower urinary tract at critical periods for forebrain division and urogenital development. Based on these clinical and molecular findings, we propose the association of *PPP1R12A* pathogenic variants with a congenital malformations syndrome affecting the embryogenesis of the brain and genitourinary systems and including disorders of sex development.

Protein phosphatase 1, regulatory subunit 12a (*PPP1R12A* [MIM: 602021]) encodes a component of myosin phosphatase (MP), a key enzyme instrumental in the regulation of cell morphology and motility.<sup>1,2</sup> *PPP1R12A* interacts with the protein phosphatase type 1 catalytic unit (PP1c) and M20/21 to form MP, which is a trimeric holoenzyme. MP regulates the function of non-muscle myosin II by regulating the phosphorylation state of myosin regulatory light chain.<sup>3–5</sup> MP activates when PP1c is unphosphorylated and bound. Phosphorylation of specific consensus sites on *PPP1R12A* by protein kinases leads to inhibition of its activity. Pathogenic variants in *PPP1R12A* prevent *PPP1R12A* from binding to PP1c and result in a non-functional MP.<sup>6</sup> Since the initial discovery of MP,<sup>5,7</sup> research to define its characterization and function has been productive, but the application of these findings to human diseases has been limited. Previously published animal models illustrate an instrumental role of *PPP1R12A* during embryogenesis through the regulation of cell movement and adhesion. The mutated *Drosophila* homologue of *PPP1R12A* (*DMYPT*) demonstrates that this protein is required for cell movement during dorsal closure and morphogenesis of the eye.<sup>8,9</sup> In *C. elegans*, *PPP1R12A* homologue MEL-11 facilitates embryonic elongation through changes in cell shape by contraction of the epidermal cell layer that encloses the embryo.<sup>10</sup> In mice, targeted

Protein phosphatase 1, regulatory subunit 12a (*PPP1R12A* [MIM: 602021]) encodes a component of myosin phosphatase (MP), a key enzyme instrumental in the regulation of cell morphology and motility.<sup>1,2</sup> *PPP1R12A* interacts with the protein phosphatase type 1 catalytic unit (PP1c) and M20/21 to form MP, which is a trimeric holoenzyme. MP regulates the function of non-muscle myosin II by regulating the phosphorylation state of myosin regulatory light chain.<sup>3–5</sup> MP activates when PP1c is unphosphorylated and bound. Phosphorylation of specific consensus sites on *PPP1R12A* by protein kinases leads to inhibition of its activity. Pathogenic variants in *PPP1R12A* prevent *PPP1R12A* from binding to PP1c and result in a non-functional MP.<sup>6</sup> Since the initial discovery of MP,<sup>5,7</sup> research to define its characterization and function has been productive, but the application of these findings to human diseases has been limited. Previously published animal models illustrate an instrumental role of *PPP1R12A* during embryogenesis through the regulation of cell movement and adhesion. The mutated *Drosophila* homologue of *PPP1R12A* (*DMYPT*) demonstrates that this protein is required for cell movement during dorsal closure and morphogenesis of the eye.<sup>8,9</sup> In *C. elegans*, *PPP1R12A* homologue MEL-11 facilitates embryonic elongation through changes in cell shape by contraction of the epidermal cell layer that encloses the embryo.<sup>10</sup> In mice, targeted

<sup>1</sup>Medical Genetics Branch, National Human Genome Research Institute, National Institutes of Health, Bethesda, MD 20892, USA; <sup>2</sup>The Prenatal Diagnosis and Medical Genetics Program, Department of Obstetrics and Gynecology, Mount Sinai Hospital, University of Toronto, Toronto, Ontario, M5G 1X5, Canada; <sup>3</sup>Division of Clinical and Metabolic Genetics, Department of Pediatrics, The Hospital for Sick Children, University of Toronto, Toronto, Ontario, M5G 1X8, Canada; <sup>4</sup>Division of Human Genetics, Children's Hospital of Philadelphia, Philadelphia, PA 19104, USA; <sup>5</sup>Department of Pediatrics, Division of Genetics and Genomic Medicine, Washington University School of Medicine, St. Louis, MO, 63110, USA; <sup>6</sup>Center for Genetic Medicine Research, Children's National Hospital, Washington, DC 20010, USA; <sup>7</sup>Department of Genomics and Precision Medicine, George Washington University, Washington, DC 20037, USA; <sup>8</sup>Division of Child Neurology, Riley Hospital for Children, Indianapolis, Indiana, 46202, USA; <sup>9</sup>Department of Pediatrics, Division of Genetics, University of California San Diego—Rady Children's Hospital, San Diego, CA 92123, USA; <sup>10</sup>Texas Scottish Rite Hospital for Children, Dallas, TX 75219, USA; <sup>11</sup>Department of Comparative Biosciences, School of Veterinary Medicine, University of Wisconsin—Madison, Madison, WI 53706, USA; <sup>12</sup>Molecular and Environmental Toxicology Center, University of Wisconsin—Madison, Madison, WI 53706, USA; <sup>13</sup>Department of Pediatric Genetics, University of Missouri Medical Center, Columbia, MO 65212, USA; <sup>14</sup>Institute of Human Genetics, Klinikum rechts der Isar, Technical University of Munich, Munich, 4JQ2+9Q, Germany; <sup>15</sup>Department of Nephrology, Klinikum rechts der Isar, Technical University of Munich, Munich, 4JQ2+9Q, Germany; <sup>16</sup>Division of Paediatric Endocrinology and Diabetology, University Children's Hospital, 69120 Heidelberg, Germany; <sup>17</sup>Division of Pediatric Endocrinology, Seattle Children's Hospital, University of Washington, Seattle, WA 98105, USA; <sup>18</sup>Division of Endocrinology, Cincinnati Children's Hospital Medical Center, University of Cincinnati College of Medicine, Cincinnati, OH 45229, USA; <sup>19</sup>Rare Disease Institute, Children's National Hospital, Washington, DC 20010, USA; <sup>20</sup>Pediatric Endocrinology, Mary Bridge Children's Hospital, Tacoma, WA 98404, USA

<sup>21</sup>Present Address: Food and Drug Administration, Silver Spring, MD 20993, USA

<sup>22</sup>These authors contributed equally to this work

\*Correspondence: [paul.kruszka@nih.gov](mailto:paul.kruszka@nih.gov)  
<https://doi.org/10.1016/j.ajhg.2019.12.004>

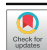

disruption of *Ppp1r12a* results in embryonic lethality before 7 days post conception.<sup>11</sup> Lastly, zebrafish *ppp1r12a* morpholino knockdown results in gastrulation defects including complete and partial cyclopia, partial cyclopia, and microphthalmia reminiscent of the severe phenotypic changes observed in humans with holoprosencephaly (HPE).<sup>12</sup> We report the association of loss-of-function (LoF) variants in *PPP1R12A* with multiple congenital anomalies, including HPE spectrum and urogenital malformations.

Twelve individuals with *de novo* LoF variants in *PPP1R12A* were identified by multiple clinical genetic centers in the United States, Canada, and Europe and evaluated by clinical exam, brain imaging (when clinically indicated), and/or autopsy. Clinical and research laboratories identified variants by exome sequencing (see Supplemental Materials and Methods in [Supplemental Information](#)). This study was approved by the National Human Genome Research Institute Institutional Review Board (IRB), Children's National Health System IRB, and local IRBs. Informed consent for publication was obtained from all individuals or legal guardians. The clinical manifestations in twelve individuals with *de novo* heterozygous LoF variants in *PPP1R12A* are summarized in [Table 1](#) and described as follows (see Supplemental Note—Case Reports in [Supplemental Information](#)). The first two individuals originated from an HPE cohort of 277 individuals (135 trios and 142 singletons).<sup>13</sup> Per protocol, Sanger sequencing of the four most common genes associated with HPE, *SHH* (MIM: 600725), *ZIC2* (MIM: 603073), *SIX3* (MIM: 603714), and *TGIF1* (MIM: 602630), failed to identify any detectable pathogenic variants (see Supplemental Materials and Methods in [Supplemental Information](#)). Individual 1 had syntelencephaly or middle interhemispheric variant (MIHV) of HPE, polymicrogyria, and Chiari I malformation identified on brain MRI, as well as other medical diagnoses including intellectual disability, attention deficit hyperactivity disorder (ADHD), and seizures. Individual 2 had semilobar HPE and agenesis of the corpus callosum identified on MRI, and other medical diagnoses included myoclonus, intellectual disability, and syndactyly of the toes. Data from individuals 3 through 10 were obtained through GeneMatcher.<sup>14</sup> In addition to agenesis of the corpus callosum and colpocephaly in the third individual and fetal acrania with exencephaly and omphalocele in the fourth individual, inclusion of urogenital anomalies and a spectrum of 46,XY disorders of sex development (DSD) was seen in individuals 5 through 10. Individuals 11 and 12 were identified through a targeted variant search in a cohort of 94 families (300 individuals) with DSD. While chromosomal sex on either CMA or karyotype was normal male on these last two individuals, their urogenital phenotypes ranged from streak gonads, rudimentary Fallopian tubes, and a urogenital sinus to ovaries which underwent gonadal degeneration, a uterus, posterior labial fusion, a clitoris, and increased labial rugation with pigmentation. Seven of 12 individuals in this

study had developmental delay ([Table 1](#): individuals 1,2,6,7,10,11, and 12); however, two of these individuals had unremarkable brain MRIs (individuals 10 and 11), and this implies that other mechanisms besides structural brain anomalies may be responsible for developmental delay. The variants in *PPP1R12A* from each of these individuals are noted in [Table 1](#), and their positions and domains are annotated along the protein in [Figure 1](#).

Brain *in situ* hybridization in mouse revealed *Ppp1r12a* expression in the prosencephalic neural folds of the mouse at gestational day (GD) 8.25. Staining of sections through the neural folds illustrated *Ppp1r12a* expression restricted to the mesenchymal compartment ([Figure 2](#)). Next, examination of *Gli2* expression occurred on the same tissues as a positive control. *Gli2* encodes the dominant Shh pathway transcriptional activator, and LoF variants in this gene cause HPE in both humans and mice.<sup>16–19</sup> *Gli2* was expressed in the head mesenchyme adjacent to the prosencephalic neuroectoderm. These results demonstrate that *Ppp1r12a* is expressed in the prosencephalic neural folds during the critical period for HPE in a pattern consistent with known HPE-associated genes. Mouse urogenital immunostaining of *PPP1R12A* showed protein localization in the lower urinary tract, specifically in epithelium of the bladder, urethra, and genital tubercle epithelium at GDs 13 and 13.75 ([Figures 3A](#) and [3C](#)). Immunohistochemical (IHC) staining was also conducted for *PPP1R12B* (MIM: 603768), which is an isoform of *PPP1R12A*. *PPP1R12B* localization was not seen in the urogenital tract at GD 13 ([Figure 3B](#)) or GD 13.75 ([Figure 3D](#)). In human embryos at week 10, IHC staining revealed *PPP1R12A* localization in the genital tubercle epithelium (ectoderm derived), the bladder and urethra (endoderm derived), urogenital sinus (UGS) mesenchymal cells, and bladder detrusor muscle ([Figure 3E](#)). *PPP1R12B* protein localization was restricted to the bladder detrusor smooth muscle ([Figure 3F](#)). These results show unique localization of *PPP1R12A* in the lower urinary tract during urethral development in advance of urethral plate closure.

In summary, we present 12 individuals with LoF variants in *PPP1R12A* and multiple congenital anomalies. The two most common affected organ systems are the brain and the genitourinary tract. Five of the 12 individuals (~40%) had midline brain anomalies found via MRI, and two individuals had HPE (individuals 1 and 2); the most severe brain finding was anencephaly (individual 4). Nine affected individuals (75%) had genitourinary malformations including three 46,XY individuals with female external genitalia. Only two individuals had both brain and genitourinary anomalies (individuals 6 and 7).

Among these individuals, there is a broad spectrum of manifestations, and a clear genotype-phenotype correlation was not seen associating with specific variants in *PPP1R12A*. The variants occurred across multiple exons (1, 5, 6, 9, 10, 11, 15, 18, and 21) as well as in intron 5. Two variants occurred in the ankyrin repeat domains, and two occurred in the rho-associated coiled-coil kinase

**Table 1. Summary of Neurologic and Urogenital Phenotypes**

|                            | 1                            | 2                                             | 3                                                              | 4                                                          | 5                                                                              | 6                                                                                                                                                | 7                                                                                               | 8                                   | 9                                                               | 10                                                                                                               | 11                                                      | 12                                                                                                       |
|----------------------------|------------------------------|-----------------------------------------------|----------------------------------------------------------------|------------------------------------------------------------|--------------------------------------------------------------------------------|--------------------------------------------------------------------------------------------------------------------------------------------------|-------------------------------------------------------------------------------------------------|-------------------------------------|-----------------------------------------------------------------|------------------------------------------------------------------------------------------------------------------|---------------------------------------------------------|----------------------------------------------------------------------------------------------------------|
| Age                        | 15 years                     | 15 years                                      | 5.5 years                                                      | 12 weeks gestation                                         | 3 years                                                                        | 6 years                                                                                                                                          | 7 years                                                                                         | 45 years                            | 2 years                                                         | 2 years                                                                                                          | 12 years                                                | 3 years                                                                                                  |
| Brain malformation         | MIHV HPE                     | semilobar HPE                                 | agenesis of the corpus callosum                                | acrania, anencephaly                                       | head CT unremarkable                                                           | dysgenesis of the corpus callosum, absent septum pellucidum, Chiari malformation, cortical dysplasia/polymicrogyria, and grey matter heterotopia | leukomalacia                                                                                    | not evaluated                       | not evaluated                                                   | brain MRI unremarkable                                                                                           | brain MRI unremarkable                                  | not evaluated                                                                                            |
| Genitourinary malformation | not evaluated                | not evaluated                                 | renal asymmetry                                                | not described on autopsy                                   | micropenis, chordee, scrotal hypospadias, bilateral cryptorchidism, and uterus | glandular hypospadias and chordee                                                                                                                | hypospadias, cryptorchidism, uterus and ovaries                                                 | uterine didelphys and streak gonads | clitoral hypertrophy, UGS, posterior fusion of the labia majora | grade 2 hypospadias, cryptorchidism, removal of right inguinal hernia identified as a fallopian tube, and uterus | streak gonads with rudimentary fallopian tubes, and UGS | clitoris, posterior labial fusion, labial rugation and pigmentation, uterus, fallopian tubes and ovaries |
| Head and facial features   | macrocephaly, hypertelorism  | microcephaly, epicanthal folds, long philtrum | not described                                                  | hypertelorism, flattened facial profile, absent nasal bone | not described                                                                  | short upslanting palpebral fissures, low-set ears, and micrognathia                                                                              | long face, large protruding ears, ptosis, small pointed nose                                    | not described                       | not described                                                   | not described                                                                                                    | not described                                           | deformed pinnae, epicanthus inversus                                                                     |
| Other                      | Developmental delay          | developmental delay, syndactyly               | ADHD, kyphoscoliosis, stiff joints, decreased subcutaneous fat | omphalocele                                                | absent                                                                         | developmental delay, strabismus, astigmatism, hyperopia, and alternating esotropia                                                               | developmental delay, bilateral rod and cone dysfunction, decreased vision, and latent nystagmus | absent                              | absent                                                          | developmental delay                                                                                              | developmental delay                                     | developmental delay, strabismus, right esotropia                                                         |
| Genotypic sex              | 46,XX                        | 46,XX                                         | 46,XY                                                          | 46,XX                                                      | 46,XY                                                                          | 46,XY                                                                                                                                            | 46,XY                                                                                           | 46,XY                               | 46,XY                                                           | 46,XY                                                                                                            | 46,XY                                                   | 46,XY                                                                                                    |
| Phenotypic sex             | female                       | female                                        | male                                                           | female                                                     | male                                                                           | male                                                                                                                                             | male                                                                                            | female                              | female                                                          | male                                                                                                             | female                                                  | female                                                                                                   |
| Inheritance                | <i>de novo</i>               | unknown                                       | <i>de novo</i>                                                 | <i>de novo</i>                                             | <i>de novo</i>                                                                 | <i>de novo</i>                                                                                                                                   | unknown                                                                                         | unknown                             | <i>de novo</i>                                                  | <i>de novo</i>                                                                                                   | <i>de novo</i>                                          | <i>de novo</i>                                                                                           |
| Variant                    | c.2033_2034delCT (p.Ser678*) | c.1415C>G (p.Ser472*)                         | c.793-1G>A                                                     | c.223_224delAC (p.Thr75Cysfs*8)                            | c.2739_2740delCT (p.Leu914Argfs*14)                                            | c.1510C>T (p.Arg504*)                                                                                                                            | c.2573G>A (p.Trp858*)                                                                           | c.2073dupA (p.Ser692Ilefs*2)        | c.2698C>T (p.Arg900*)                                           | c.960dupA (p.Glu321Argfs*6)                                                                                      | c.1189delA (p.Thr397Hisfs*42)                           | c.681dupT (p.Lys228*)                                                                                    |

Individuals 1–4 share the neurological phenotype, individuals 3 and 5–12 share diverse urogenital malformations, and individuals 3, 6, and 7 share an overlap of both. Notable discordance in genotypic and phenotypic sex is seen between the 46,XX and 46,XY individuals, but the significance requires further investigation. Transcript NM\_002480.3 was used for all described variants in *PPP1R12A*. Abbreviations: MIHV—middle interhemispheric variant, HPE—holoprosencephaly, ADHD—attention deficit hyperactivity disorder, and UGS—urogenital sinus.

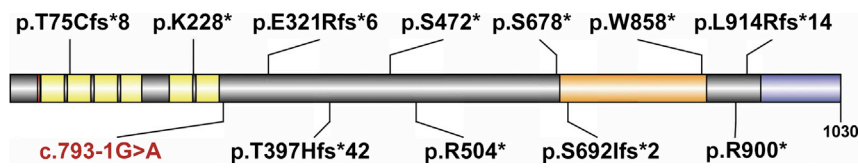

**Figure 1. PPP1R12A with Variant Annotations and Highlighted Regions**

Per UniProt, domains include a Lysine-Valine-Lysine-Phenylalanine (KVKF) motif (red), multiple ankyrin repeats (yellow), rho-associated coiled-coil-containing protein kinase 1 (ROCK1) and rho-associated coiled-

coil-containing protein kinase 2 (ROCK2) interaction site (orange), and a leucine zipper domain which binds a cGMP-dependent protein kinase 1. Stop gain and frameshift variants are notated in black with the splice-site variant in red at the approximate site predicted to result in a premature termination codon and nonsense-mediated decay. Diagram was created using Domain Graph version 2.0.<sup>15</sup>

binding domains without an observable pattern between the phenotypes. Premature termination codon (PTC) with subsequent nonsense-mediated decay (NMD) was predicted for the stop gain and frameshift variants because these followed the previously described criteria for this mechanism.<sup>20,21</sup> *In silico* modeling of the splice-site variant predicted canonical splice acceptor site destruction in intron 5 with secondary PTC and NMD. Tissue-specific mRNA expression patterns were not available for individuals in this study, and review of a prior expression study on human fetal samples did not specifically include brain or urogenital tissue.<sup>22</sup> As such, the value of comparing expression of *PPP1R12A* in adult tissues to expression during fetal development is limited because the impact leading to the observed phenotypes may be most influenced by these initial alterations. Review of DECIPHER revealed copy-number variants (CNV) of various sizes involving *PPP1R12A*. Neurologic and urogenital phenotypes were noted, but direct comparison of these CNVs remains limited due to the limited ability to quantify the haploinsufficiency from each of the other deleted genes. 12q21 deletion syndrome, which only has six reported cases, encompasses this gene and shares cryptorchidism, pylectasis/hydronephrosis, developmental delay, and various neurologic malformations including hypoplasia of the corpus callosum.<sup>23</sup> Last, while none of these variants were present in gnomAD, of the 59.8 expected LoF variants, only three have been observed, and two of those have been flagged for further review on quality or annotation. This produces an observed over expected ratio of 0.05 and is within the range associated with genes intolerant to LoF. The remaining individual in gnomAD would need an evaluation

because both the milder neurologic and urogenital phenotypic spectrum may not be apparent without further clinical examination.

The pathogenesis of brain malformations secondary to haploinsufficiency of *PPP1R12A* is incompletely understood. Experiments have shown that elimination of either MP subunit (*PPP1R12A* or *PP1c*) results in lost expression of the remaining subunit and is thought to contribute to decreased activity of the MP holoenzyme.<sup>24</sup> We show here that *Ppp1r12a* is expressed in the neural folds of the embryonic mouse brain at the critical time for forebrain development (Figure 2). Forebrain division occurs in early embryogenesis. A complex signaling pattern, including sonic hedgehog, emanates from the prechordal plate (PrCP) beneath the telencephalon and directs median forebrain expansion and division shortly after gastrulation.<sup>25</sup> Brain malformations including HPE, anencephaly, and agenesis of the corpus callosum were found in these individuals. HPE occurs in approximately one in 10,000 live-borns and one in 250 conceptuses. The clinical spectrum of HPE ranges from the most severe form with cyclopia and one cerebral ventricle (alobar HPE) to almost complete cerebral hemisphere division (lobar HPE). The etiology of HPE is heterogenous, and both genetic and environmental causes have been identified. However, most individuals with unremarkable karyotypes remain undiagnosed.<sup>26,27</sup> Individuals 1 and 2 had HPE which precisely matched the cyclopia phenotype in zebrafish; the most severe finding was fetal acrania with exencephaly seen in individual 4. The pathways associated with HPE are perturbed in human and animal models of exencephaly; these pathways include *Tgif* (mouse model), *Shh*, and *Gli2*,<sup>28</sup> and

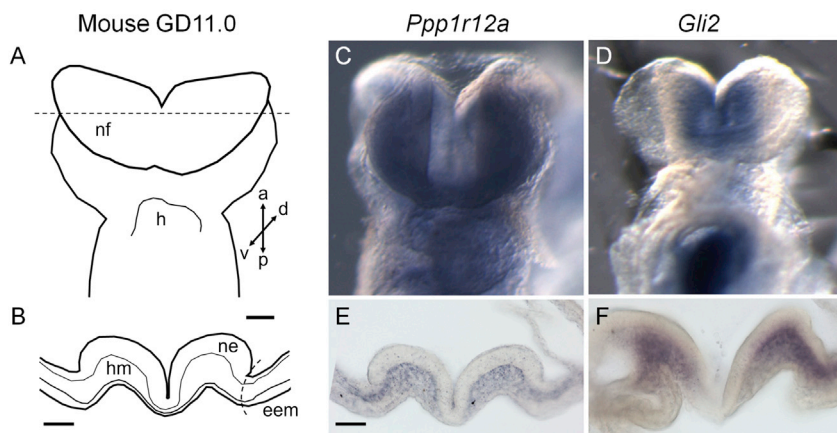

**Figure 2. Brain: Mouse *in situ* Hybridization of the Prosencephalic Neural Folds**

Gestational day 8.25 mouse embryos were stained via *in situ* hybridization in order to determine gene expression patterns. A ventral view is shown for whole mounts. Transverse sections through the prosencephalic neural folds (at the level of the dashed line in schematic) were stained in order to visualize gene expression in specific cellular compartments. *Ppp1r12a* localized to the head mesenchyme and is absent from extra-embryonic membranes. nf—neural folds, h—heart, ne—neuroectoderm, hm—head mesenchyme, eem—extra-embryonic membranes. Scale bar = 100  $\mu$ m.

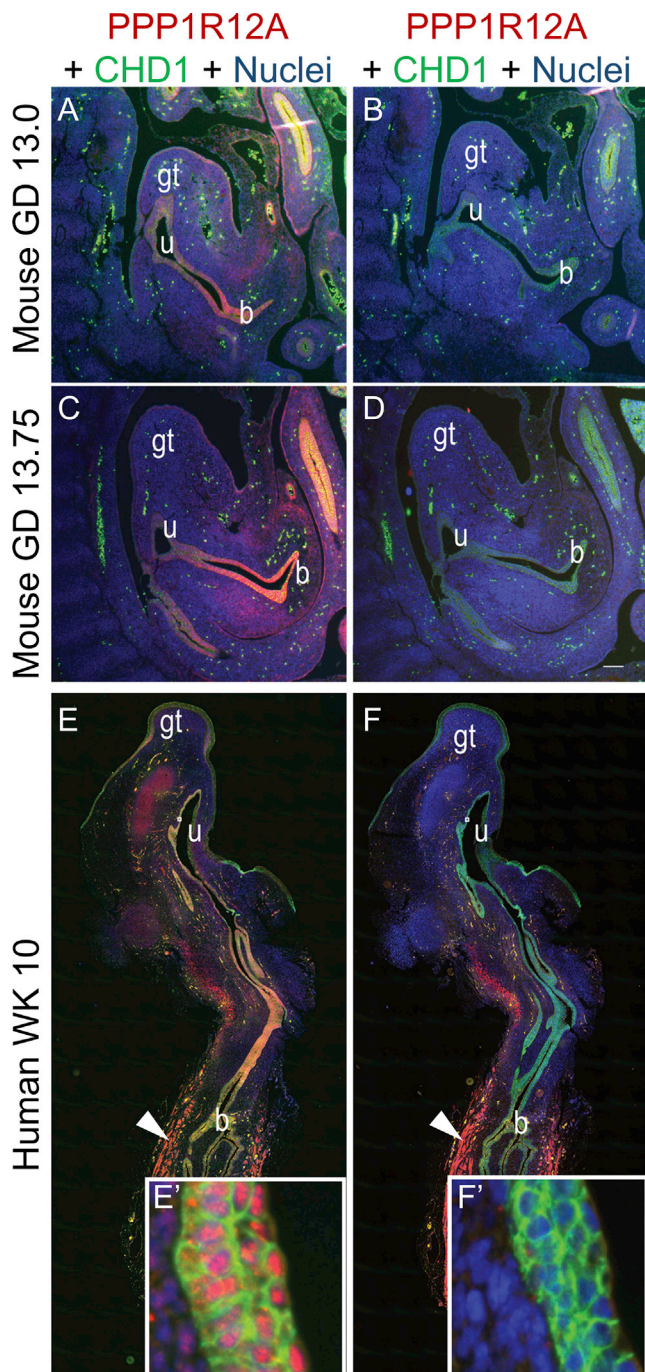

**Figure 3. Urogenital: Mouse and Human Immunostaining of the Genitourinary Tract**

(A–B) Tissue sections from mouse genitourinary tracts at gestation day (GD) 13.

(C–D) Mouse genitourinary tracts at GD13.75.

(E–F) Human genitourinary tracts at week 10 were immunostained in order to detect protein localization patterns. PPP1R12A was detected in genital tubercle epithelium (ectoderm derived), bladder, and urethral epithelium (endoderm derived), and a subset of urogenital sinus mesenchymal cells (arrowhead) bladder detrusor smooth muscle. (E') PPP1R12A localized to epithelial cell nuclei of human urethra (lower image, inset). (F', arrowhead) PPP1R12B detected in developing human detrusor smooth muscle (B, D, F, F') but not in developing mouse or human bladder or urogenital sinus epithelial cells. Abbreviations are B—bladder, GT—genital tubercle, U—urethra.

13q deletions which include *ZIC2* (humans). Additionally, in a series of 150 embryos with HPE, 14 were noted to have exencephaly and/or myeloschisis.<sup>29</sup> Gathering more individuals with fetal acrania may provide another area to investigate for variants in *PPP1R12A*.

While these individuals provide initial evidence supporting the importance of *PPP1R12A* in development, more research will be needed in order to understand the precise mechanism that *PPP1R12A* causes in these malformations. Current evidence does not support the possibility that *PPP1R12A* is part of the canonical pathways of HPE such as the hedgehog signaling pathways; however, *PPP1R12A* has an established role in cell migration, cell adhesion, and cytoskeletal organization.<sup>30,31</sup> Animal models, such as zebrafish morpholino knockdown of *ppp1r12a* (also known as *mypt*), resulted in defective PrCP anterior migration,<sup>12</sup> and removal of the PrCP resulted in cyclopia.<sup>32–34</sup> These findings support the association between *PPP1R12A* LoF variants and HPE. While the zebrafish provides a commonly used model for comparison to human neurodevelopment, due to its less-understood mechanisms, it does not model human sex differentiation and gonadal development.<sup>35</sup> As seen with the zebrafish, we draw connections between the cell migration defects and midline brain malformations.

Other genetic conditions known to have both brain and urogenital malformations include Smith-Lemli-Opitz syndrome (MIM: 270400), X-linked lissencephaly (MIM: 300215), microcephaly, facial dysmorphism, renal agenesis, and ambiguous genitalia syndrome (MIM: 618142), pontocerebellar hypoplasia type 7 (MIM: 614969), orofaciocigital syndrome IV (MIM: 258860), and other conditions with complete gonadal dysgenesis and discordance between the phenotypic and genotypic sex. Syndromic and non-syndromic causes have also been reported, but the etiology in many affected individuals remains broad due to the phenotypic overlap between individuals with partial androgen insensitivity and those with partial gonadal dysgenesis.<sup>36–38</sup> Individuals 5–12 had a wide spectrum of genitourinary phenotypes from partial gonadal dysgenesis with micropenis, hypospadias, and ambiguous genitals with Müllerian duct remnants to complete gonadal dysgenesis in a genotypic 46,XY individual with female external genitalia. *Ppp1r12a* has been noted to be increased in mouse striated and smooth muscle during sexual differentiation with higher levels in males than females.<sup>39</sup> The high number of 46,XY individuals with urogenital anomalies (nine out of 12) in this report may either reflect ascertainment bias or a probable sex-influenced mechanism, in contrast to the remaining three 46,XX individuals with severe brain anomalies (HPE and anencephaly).

Müllerian ducts are formed via several steps including specification, invagination through apical constriction, and elongation. Multiple signaling systems are involved in the process of Müllerian duct formation; these include RhoA GTPases, molecules known to modulate

the processes of many epithelial tissue invaginations and morphogenesis through the indirect increase of non-muscle myosin II activity. Given the clinical findings, we propose that alterations to this pathway could change the development of these ducts and subsequently lead to defective regression of the Müllerian ducts, in the presence of sex-determining region Y (SRY), and ultimately result in a DSD. Sexual differentiation occurs in the undifferentiated zygote through complex interactions between genetic and developmental processes. During this process, phenotypic sexual differences are evolved through the presence or absence of SRY and through impairment of the cascades of developmental events downstream. However, the developmental processes that cause DSD remain unknown, and in many instances, individuals do not receive a molecular diagnosis. Recently, the Rho-kinase pathway was found to be a major regulator of the male urogenital function and disorders.<sup>40</sup> Notably, PPP1R12A, which is downstream of this system, is highly localized in the developing reproductive system<sup>39</sup> and remains highly expressed in human adult uterus and vagina (GTEx). While the specific role of PPP1R12A in external and internal genitalia development has not been previously described, these individuals provide a starting point for further research regarding the role of this gene in DSD.

In summary, these 12 individuals illustrate the association of PPP1R12A with HPE spectrum phenotypes and urogenital malformations including DSD. *In situ* mouse hybridization studies of *Ppp1r12a* demonstrate expression precisely at the proper time and location for brain development implicated in HPE, and our immunostaining of PPP1R12A in the mouse embryo and human tissue reveals protein localization patterns in the developing lower urinary tract epithelium, which is responsible for bladder, urethral, and genital tubercle formation.

#### Accession Numbers

The accession number for the sequence reported in this paper is ClinVar: VCV000450254.

#### Supplemental Data

Supplemental Data can be found online at <https://doi.org/10.1016/j.ajhg.2019.12.004>.

#### Acknowledgments

We thank the families for their participation in this publication. This work was supported by the National Human Genome Research Institute Intramural Research program. Work in the R.J.L. lab was supported by the National Institute of Environmental Health Sciences of the National Institutes of Health (NIH) under award numbers R01ES026819 and T32ES007015. Work in the CMV lab was supported by NIH grant U01DK110807. E.D., E.V., M.R., and P.F. are supported in part by the Disorder of Sex Development Translational Research Network (R01 HD093450). The DSD whole-genome sequencing project was

funded by the Gabriella Miller Kids First Initiative (XO1HL132384, E.V.). We are grateful for the help of Linda Ramsdell, MS, CGC (Seattle Children's Hospital) and Kimberly Kennedy, RN (Cincinnati Children's Hospital) for individuals 11 and 12. The Genotype-Tissue Expression (GTEx) Project was supported by the Common Fund of the Office of the Director of the NIH, and by the National Cancer Institute (NCI), the National Human Genome Research Institute (NHGRI), the National Heart, Lung, and Blood Institute (NHLBI), the National Institute on Drug Abuse (NIDA), the National Institute of Mental Health (NIMH), and the National Institute of Neurological Disorders and Stroke (NINDS). The data used for the analyses described in this manuscript were obtained from the GTEx Portal on 10/10/19.

#### Declaration of Interests

The authors declare no competing interests.

Received: October 21, 2019

Accepted: December 4, 2019

Published: December 26, 2019

#### Web Resources

DECIPHER, <https://decipher.sanger.ac.uk/>  
gnomAD, <https://gnomad.broadinstitute.org/>  
GTEx, <https://gtexportal.org/home/>  
OMIM, <https://omim.org/>  
UniProt, <https://uniprot.org/>

#### References

1. Grassie, M.E., Moffat, L.D., Walsh, M.P., and MacDonald, J.A. (2011). The myosin phosphatase targeting protein (MYPT) family: a regulated mechanism for achieving substrate specificity of the catalytic subunit of protein phosphatase type 1δ. *Arch. Biochem. Biophys.* 510, 147–159.
2. Kiss, A., Erdődi, F., and Lontay, B. (2019). Myosin phosphatase: Unexpected functions of a long-known enzyme. *Biochim. Biophys. Acta Mol. Cell Res.* 1866, 2–15.
3. Ito, M., Nakano, T., Erdodi, F., and Hartshorne, D.J. (2004). Myosin phosphatase: structure, regulation and function. *Mol. Cell. Biochem.* 259, 197–209.
4. Shichi, D., Arimura, T., Ishikawa, T., and Kimura, A. (2010). Heart-specific small subunit of myosin light chain phosphatase activates rho-associated kinase and regulates phosphorylation of myosin phosphatase target subunit 1. *J. Biol. Chem.* 285, 33680–33690.
5. Shimizu, H., Ito, M., Miyahara, M., Ichikawa, K., Okubo, S., Konishi, T., Naka, M., Tanaka, T., Hirano, K., Hartshorne, D.J., et al. (1994). Characterization of the myosin-binding subunit of smooth muscle myosin phosphatase. *J. Biol. Chem.* 269, 30407–30411.
6. Huang, H., Ruan, H., Aw, M.Y., Hussain, A., Guo, L., Gao, C., Qian, F., Leung, T., Song, H., Kimelman, D., et al. (2008). Mypt1-mediated spatial positioning of Bmp2-producing cells is essential for liver organogenesis. *Development* 135, 3209–3218.
7. Alessi, D., MacDougall, L.K., Sola, M.M., Ikebe, M., and Cohen, P. (1992). The control of protein phosphatase-1 by targeting subunits. The major myosin phosphatase in avian

- smooth muscle is a novel form of protein phosphatase-1. *Eur. J. Biochem.* 210, 1023–1035.
8. Tan, C., Stronach, B., and Perrimon, N. (2003). Roles of myosin phosphatase during *Drosophila* development. *Development* 130, 671–681.
  9. Mizuno, T., Tsutsui, K., and Nishida, Y. (2002). *Drosophila* myosin phosphatase and its role in dorsal closure. *Development* 129, 1215–1223.
  10. Wissmann, A., Ingles, J., and Mains, P.E. (1999). The *Caenorhabditis elegans* mel-11 myosin phosphatase regulatory subunit affects tissue contraction in the somatic gonad and the embryonic epidermis and genetically interacts with the Rac signaling pathway. *Dev. Biol.* 209, 111–127.
  11. Okamoto, R., Ito, M., Suzuki, N., Kongo, M., Moriki, N., Saito, H., Tsumura, H., Imanaka-Yoshida, K., Kimura, K., Mizoguchi, A., et al. (2005). The targeted disruption of the MYPT1 gene results in embryonic lethality. *Transgenic Res.* 14, 337–340.
  12. Weiser, D.C., Row, R.H., and Kimelman, D. (2009). Rho-regulated myosin phosphatase establishes the level of protrusive activity required for cell movements during zebrafish gastrulation. *Development* 136, 2375–2384.
  13. Kruszka, P., Berger, S.I., Casa, V., Dekker, M.R., Gaesser, J., Weiss, K., Martinez, A.F., Murdock, D.R., Louie, R.J., Prioles, E.J., et al. (2019). Cohesin complex-associated holoprosencephaly. *Brain* 142, 2631–2643.
  14. Sobreira, N., Schiettecatte, F., Valle, D., and Hamosh, A. (2015). GeneMatcher: a matching tool for connecting investigators with an interest in the same gene. *Hum. Mutat.* 36, 928–930.
  15. Ren, J., Wen, L., Gao, X., Jin, C., Xue, Y., and Yao, X. (2009). DOG 1.0: illustrator of protein domain structures. *Cell Res.* 19, 271–273.
  16. Chiang, C., Litingtung, Y., Lee, E., Young, K.E., Corden, J.L., Westphal, H., and Beachy, P.A. (1996). Cyclopia and defective axial patterning in mice lacking Sonic hedgehog gene function. *Nature* 383, 407–413.
  17. Hong, S., Hu, P., Marino, J., Hufnagel, S.B., Hopkin, R.J., Toromanović, A., Richieri-Costa, A., Ribeiro-Bicudo, L.A., Kruszka, P., Roessler, E., and Muenke, M. (2016). Dominant-negative kinase domain mutations in FGFR1 can explain the clinical severity of Hartsfield syndrome. *Hum. Mol. Genet.* 25, 1912–1922.
  18. Solomon, B.D., Bear, K.A., Wyllie, A., Keaton, A.A., Dubourg, C., David, V., Mercier, S., Odent, S., Hehr, U., Paulussen, A., et al. (2012). Genotypic and phenotypic analysis of 396 individuals with mutations in Sonic Hedgehog. *J. Med. Genet.* 49, 473–479.
  19. Heyne, G.W., Everson, J.L., Ansen-Wilson, L.J., Melberg, C.G., Fink, D.M., Parins, K.F., Doroodchi, P., Ulschmid, C.M., and Lipinski, R.J. (2016). Gli2 gene-environment interactions contribute to the etiological complexity of holoprosencephaly: evidence from a mouse model. *Dis. Model. Mech.* 9, 1307–1315.
  20. Lewis, B.P., Green, R.E., and Brenner, S.E. (2003). Evidence for the widespread coupling of alternative splicing and nonsense-mediated mRNA decay in humans. *Proc. Natl. Acad. Sci. USA* 100, 189–192.
  21. Chang, Y.F., Imam, J.S., and Wilkinson, M.F. (2007). The nonsense-mediated decay RNA surveillance pathway. *Annu. Rev. Biochem.* 76, 51–74.
  22. Szabo, L., Morey, R., Palpant, N.J., Wang, P.L., Afari, N., Jiang, C., Parast, M.M., Murry, C.E., Laurent, L.C., and Salzman, J. (2015). Statistically based splicing detection reveals neural enrichment and tissue-specific induction of circular RNA during human fetal development. *Genome Biol.* 16, 126.
  23. McKenna, C.S., Saxena, N., Dabir, T.A., Jones, J., Smith, G., and Morrison, P.J. (2019). Phenotypic delineation of a 12q21 deletion syndrome. *Clin. Dysmorphol.* 28, 198–201.
  24. Scotto-Lavino, E., Garcia-Diaz, M., Du, G., and Frohman, M.A. (2010). Basis for the isoform-specific interaction of myosin phosphatase subunits protein phosphatase 1c beta and myosin phosphatase targeting subunit 1. *J. Biol. Chem.* 285, 6419–6424.
  25. Roessler, E., and Muenke, M. (2010). The molecular genetics of holoprosencephaly. *Am. J. Med. Genet. C. Semin. Med. Genet.* 154C, 52–61.
  26. Kruszka, P., Martinez, A.F., and Muenke, M. (2018). Molecular testing in holoprosencephaly. *Am. J. Med. Genet. C. Semin. Med. Genet.* 178, 187–193.
  27. Kruszka, P., and Muenke, M. (2018). Syndromes associated with holoprosencephaly. *Am. J. Med. Genet. C. Semin. Med. Genet.* 178, 229–237.
  28. Kietzman, H.W., Everson, J.L., Sulik, K.K., and Lipinski, R.J. (2014). The teratogenic effects of prenatal ethanol exposure are exacerbated by Sonic Hedgehog or GLI2 haploinsufficiency in the mouse. *PLoS ONE* 9, e89448.
  29. Cohen, M.M., Jr. (2006). Holoprosencephaly: clinical, anatomic, and molecular dimensions. *Birth Defects Res. A Clin. Mol. Teratol.* 76, 658–673.
  30. Xia, D., Stull, J.T., and Kamm, K.E. (2005). Myosin phosphatase targeting subunit 1 affects cell migration by regulating myosin phosphorylation and actin assembly. *Exp. Cell Res.* 304, 506–517.
  31. Zagórska, A., Deak, M., Campbell, D.G., Banerjee, S., Hirano, M., Aizawa, S., Prescott, A.R., and Alessi, D.R. (2010). New roles for the LKB1-NUAK pathway in controlling myosin phosphatase complexes and cell adhesion. *Sci. Signal.* 3, ra25.
  32. Feldman, B., Gates, M.A., Egan, E.S., Dougan, S.T., Rennebeck, G., Sirotkin, H.I., Schier, A.F., and Talbot, W.S. (1998). Zebrafish organizer development and germ-layer formation require nodal-related signals. *Nature* 395, 181–185.
  33. Schier, A.F. (2003). Nodal signaling in vertebrate development. *Annu. Rev. Cell Dev. Biol.* 19, 589–621.
  34. Shih, J., and Fraser, S.E. (1996). Characterizing the zebrafish organizer: microsurgical analysis at the early-shield stage. *Development* 122, 1313–1322.
  35. Santos, D., Luzio, A., and Coimbra, A.M. (2017). Zebrafish sex differentiation and gonad development: A review on the impact of environmental factors. *Aquat. Toxicol.* 191, 141–163.
  36. Délot, E.C., Papp, J.C., Sandberg, D.E., Vilain, E.; and DSD-TRN Genetics Workgroup (2017). Genetics of Disorders of Sex Development: The DSD-TRN Experience. *Endocrinol. Metab. Clin. North Am.* 46, 519–537.
  37. Parivesh, A., Barseghyan, H., Délot, E., and Vilain, E. (2019). Translating genomics to the clinical diagnosis of disorders/differences of sex development. *Curr. Top. Dev. Biol.* 134, 317–375.
  38. Délot, E.C., and Vilain, E.J. (2003 Oct 30). Nonsyndromic 46,XX Testicular Disorders of Sex Development. In

- GeneReviews, M.P. Adam, H.H. Ardinger, R.A. Pagon, S.E. Wallace, L.J.H. Bean, K. Stephens, and A. Amemiya, eds. (Seattle: University of Washington), pp. 1993–2019, [Internet].
39. Lontay, B., Bodoor, K., Weitzel, D.H., Loiselle, D., Fortner, C., Lengyel, S., Zheng, D., Devente, J., Hickner, R., and Haystead, T.A. (2010). Smoothelin-like 1 protein regulates myosin phosphatase-targeting subunit 1 expression during sexual development and pregnancy. *J. Biol. Chem.* 285, 29357–29366.
40. Gur, S., Kadowitz, P.J., and Hellstrom, W.J. (2011). RhoA/Rho-kinase as a therapeutic target for the male urogenital tract. *J. Sex. Med.* 8, 675–687.



**Supplemental Data**

**Loss-of-Function Variants in *PPP1R12A*: From Isolated  
Sex Reversal to Holoprosencephaly Spectrum  
and Urogenital Malformations**

**Joel J. Hughes, Ebba Alkhunaizi, Paul Kruszka, Louise C. Pyle, Dorothy K. Grange, Seth I. Berger, Katelyn K. Payne, Diane Masser-Frye, Tommy Hu, Michelle R. Christie, Nancy J. Clegg, Joshua L. Everson, Ariel F. Martinez, Laurence E. Walsh, Emma Bedoukian, Marilyn C. Jones, Catharine Jean Harris, Korbinian M. Riedhammer, Daniela Choukair, Patricia Y. Fechner, Meilan M. Rutter, Sophia B. Hufnagel, Maian Roifman, Gad B. Kletter, Emmanuele Delot, Eric Vilain, Robert J. Lipinski, Chad M. Vezina, Maximilian Muenke, and David Chitayat**

## 1 Supplemental Note: Case Reports

2

3 Individual 1: She was born at term to a 19-year-old mother by Cesarean delivery and weighed 3.23 kg  
4 (50<sup>th</sup> centile). The pregnancy was complicated by maternal hypertension, pre-eclampsia, diabetes, and  
5 exposure to alcohol and marijuana at approximately 8 weeks gestation. She had syntelencephaly/middle  
6 interhemispheric variant (MIHV) of HPE, polymicrogyria, and Chiari I malformation identified on brain  
7 MRI. Other medical problems included intellectual disability, attention deficit hyperactivity disorder  
8 (ADHD), and seizures. Sanger sequencing of the four most common genes associated with HPE, *SHH*  
9 (MIM: 600725), *ZIC2* (MIM: 603073), *SIX3* (MIM: 603714), and *TGIF* (MIM: 602630), failed to  
10 identify any detectable pathogenic variants. Trio exome sequencing revealed a heterozygous *de novo*  
11 variant in *PPP1R12A*, NM\_002480.3:c.2033\_2034del p.(Ser678\*), which was confirmed by Sanger  
12 sequencing.

13 Individual 2: She was a 6-year-old female with semilobar HPE and agenesis of the corpus callosum  
14 identified on MRI. Other medical problems included myoclonus, intellectual disability, and syndactyly of  
15 the toes. Sanger sequencing of *SHH*, *SIX3*, *ZIC2*, and *TGIF* failed to identify detectable pathogenic  
16 variants. Trio exome sequencing revealed a heterozygous *de novo* variant in *PPP1R12A*,  
17 NM\_002480.3:c.1415C>G p.(Ser472\*), which was confirmed by Sanger sequencing.

18 Individual 3: Prenatally, he had a fetal ultrasound and MRI which demonstrated agenesis of the corpus  
19 callosum and colpocephaly as well as pyelectasis and intrauterine growth restriction. Chromosome  
20 analysis of amniocytes showed 46,XY Normal male. A Cesarean delivery occurred at 36 2/7 weeks for  
21 breech presentation and oligohydramnios. Significant findings on newborn evaluation included low birth  
22 weight of 2.04 kg (3-10<sup>th</sup> centile), decreased subcutaneous fat, mild facial asymmetry, ulnar drift at the  
23 wrist and fisting, upper back kyphosis, and grade 1 hydronephrosis with renal asymmetry detected by  
24 ultrasound. Findings at age 5.5 years were grossly unchanged apart from additional behavioral issues  
25 including ADHD and defiance. A chromosome microarray analysis (CMA) was arr(1-22)normal. Trio

26 exome sequencing through GeneDx revealed a heterozygous *de novo* splice site variant in *PPP1R12A*,  
27 NM\_002480.3: c.793-1G>A.

28 Individual 4: Prenatally, an 11-week antenatal ultrasound showed fetal acrania with exencephaly,  
29 hypertelorism, flattened facial profile with non-visualization of the nasal bone, omphalocele, echogenic  
30 bowel, and non-visualization of the lumbosacral spine. Fetal growth was normal. The parents were of  
31 Chinese descent, non-consanguineous and with an unremarkable family history. The pregnancy was  
32 interrupted and limited pathological assessment of the fetus and placenta at 12 weeks gestation revealed  
33 the presence of a partial cranial vault with scant white-grey tissue and spinal column. Chorionic villus and  
34 fetal neural, renal, gastrointestinal, and cardiac tissues were histologically examined and unremarkable.  
35 Maternal serum folate and vitamin B12 levels were within normal range. CMA on products of conception  
36 was arr(1-22,X)x2 normal female. *UPD11* testing and *CDKN1C* sequencing obtained due to the presence  
37 of an omphalocele on ultrasound showed no abnormalities. Trio exome sequencing identified a  
38 heterozygous *de novo* frameshift variant in *PPP1R12A*, NM\_002480.3:c.223\_224delAC  
39 p.(Thr75Cysfs\*8).

40 Individual 5: He was a 3-year-old male with ambiguous genitalia at birth. Physical exam revealed  
41 micropenis, chordee, scrotal hypospadias, bilateral cryptorchidism, and a uterus on ultrasound. No other  
42 birth defects were reported. Additionally, serum anti-Müllerian hormone levels were below normal range.  
43 Karyotype was 46,XY Normal male. Developmentally, he was reported appropriate for age and had an  
44 unremarkable head CT scan. Trio exome sequencing by GeneDx identified a *de novo* heterozygous  
45 frameshift variant in *PPP1R12A* NM\_002480.3: c.2739\_2740delCT p.(Leu914Argfs\*14).

46 Individual 6: He was a 6-year-old male found on fetal ultrasound, at 19 weeks of gestation, to have an  
47 encephalocele at the posterior parietal region and colpocephaly. The pregnancy was complicated by  
48 chronic maternal hypertension, type II diabetes mellitus controlled with insulin, and intrauterine growth  
49 restriction. At birth, he was noted to have thrombocytopenia requiring platelet transfusion. He had  
50 ventriculoperitoneal shunt insertion for hydrocephalus and encephalocele repair shortly after birth.  
51 Postnatal MRI revealed dysgenesis of the corpus callosum, absent septum pellucidum, Chiari

52 malformation, cortical dysplasia/polymicrogyria and grey matter heterotopia. Neurological examination  
53 was notable for global developmental delay, intellectual disability, autistic features, appendicular  
54 hypotonia with foot pronation requiring supra malleolar orthosis (SMO) braces bilaterally, and an  
55 unsteady gait. He sat at 1 year, walked at 3 years, and continued to have difficulties with expressive  
56 language with limited speech. He had minor dysmorphic facial features including short upslanting  
57 palpebral fissures, low-set ears, and micrognathia. Other significant features included short stature, patent  
58 ductus arteriosus, and ophthalmologic abnormalities including strabismus, astigmatism, hyperopia, and  
59 alternating esotropia. The genitourinary abnormalities included glandular hypospadias and chordee which  
60 required surgical correction. Karyotype was 46,XY Normal male and trio exome sequencing by GeneDx  
61 identified a heterozygous nonsense *de novo* variant in *PPP1R12A* NM\_002480.3:c.1510C>T  
62 p.(Arg504\*).

63 Individual 7: He was a 7-year-old male with genitourinary malformations including hypospadias,  
64 cryptorchidism, and a uterus. The prenatal and early medical history is unknown, as he was adopted out.  
65 Karyotype was 46,XY Normal male. He had generalized developmental delay, seizures and brain MRI  
66 showed microcephaly and leukomalacia along with opacified left tympanic cavity and mastoid air cells.  
67 Facial dysmorphism was noted including long face, large prominent ears, ptosis, and a small pointed  
68 nose. Other abnormalities included, 5th finger clinodactyly, and blind shallow rectal cleft. Further  
69 investigation revealed delayed bone age, bilateral rod and cone dysfunction with decreased vision, and  
70 latent nystagmus. Singleton exome sequencing by GeneDx revealed a heterozygous nonsense variant in  
71 *PPP1R12A*, NM\_002480.3:c.2573G>A p.(Trp858\*).

72 Individual 8: She was a 45-year-old female with typical female external genitalia and a 46,XY Normal  
73 male karyotype. Pelvic ultrasound identified a small uterus didelphys. She had a history of a bilateral  
74 gonadectomy in childhood; however, the pathologist did not specify ovarian or testicular tissue on report.  
75 She had primary amenorrhea and was over 6 feet tall. *SRY* and *NR5A1* gene sequencing were  
76 unremarkable. There were no reported neurological issues, developmental delay, or other malformations.

77 Singleton exome sequencing performed at GeneDx identified a heterozygous frameshift in *PPP1R12A*  
78 NM\_002480.3:c.2073dupA p.(Ser692Ilefs\*2).

79 Individual 9: She was a 9-month-old phenotypic female with a 46,XY Normal male karyotype, and had  
80 external genitalia notable for clitoral hypertrophy (0.5 cm in diameter), urogenital sinus (UGS), vaginal  
81 opening and posterior fusion of the labia majora. No uterus was identified on pelvic ultrasound. Prenatal  
82 history was unremarkable with spontaneous vaginal delivery at 39 weeks. Biochemical workup was not  
83 consistent with congenital adrenal hyperplasia. Neuroimaging was not indicated at that time. Trio exome  
84 sequencing performed via a German health care project for rare diseases revealed a heterozygous *de novo*  
85 nonsense variant in *PPP1R12A* NM\_002480.3:c.2698C>T p.(Arg900\*).

86 Individual 10: He was a 2-year-old phenotypic male with 46,XY Normal male karyotype, evaluated by  
87 clinical genetics due to grade 2 hypospadias and cryptorchidism. He was born premature at 27 weeks. A  
88 Fallopian tube without mention of an attached gonad was identified during surgical repair of a right  
89 inguinal hernia. Abdominal ultrasound showed a uterus. Physical exam was notable for short stature,  
90 macrocephaly, triangular face, long palpebral fissures, ptosis, small mouth and wide nasal tip. He had  
91 global developmental delay and brain MRI was normal. A CMA was normal. Trio exome sequencing by  
92 GeneDx revealed a likely pathogenic heterozygous maternally inherited variant in *SCN8A*,  
93 NM\_01491.3:c.2424dupT p.(Pro809Serfs\*13) which was identified in a clinically unaffected sib, as well  
94 as a heterozygous *de novo* variant in *PPP1R12A*, NM\_002480.3:c.960dupA p.(Glu321Argfs\*6).

95 Individual 11: She was a adult female with 46,XY gonadal dysgenesis, alopecia totalis, obesity and  
96 acanthosis nigricans. Diagnostic laparoscopy at age 6 identified two streak gonads (abdominal on the  
97 right and inguinal on the left) which were resected, with rudimentary Fallopian tubes, a vaginal opening,  
98 and no uterus. She has had normal development and brain MRI was normal. At age 30, she is doing well  
99 on hormone replacement therapy. Trio research genome sequencing identified a heterozygous *de novo*  
100 variant in *PPP1R12A*, NM\_002480.3:c.1189delA p.(Thr397Hisfs\*42) which was confirmed by Sanger  
101 sequencing.

102 Individual 12: She was evaluated by genetics due to discordance between the chromosome sex (46,XY)  
103 on cell free non-invasive prenatal testing and the phenotypic sex as identified on fetal ultrasound showing  
104 a female external genitalia. Postnatally, she was noted to have jejunal and ileal atresia. Surgery revealed  
105 an aberrant mesenteric blood supply, normal-appearing ovaries with Fallopian tubes and a uterus. CMA  
106 was arr(1-22)x2,(X,Y)x1 normal male. An ultrasound at 1 year showed normal kidneys and confirmed the  
107 presence of a uterus, but did not identify gonads, suggesting gonadal degeneration. Examination at age 2  
108 showed a clitoris, posterior labial fusion, increased labial rugation and pigmentation, and mild  
109 gynecomastia. Her growth parameters were normal. She had strabismus, bilateral epicanthus inversus,  
110 right esotropia, abnormal auricles, bilateral 5<sup>th</sup> digit clinodactyly, and spoon-shaped toenails. She had  
111 developmental delay and autism spectrum disorder. Brain MRI has not been done. Luteinizing hormone  
112 and FSH was within normal range, and anti-müllerian hormone and testosterone was lower than normal  
113 range for a male with a 46,XY karyotype. Research genome sequencing identified a heterozygous *de novo*  
114 variant in *PPP1R12A*, NM\_002480.3:c.681dupT (p.Lys228Ter) which was confirmed by Sanger  
115 sequencing.

116

## 117 **Supplemental Material and Methods**

118

119 **Brain: mouse *in situ* hybridization.** Genes that regulate forebrain patterning and play a role in  
120 HPE pathogenesis are expected to be expressed in the prosencephalic neural folds that give rise  
121 to the forebrain during primary neurulation.<sup>1</sup> Therefore, we conducted *in situ* hybridization (ISH)  
122 on mouse embryos at gestational day (GD) 8.25. This stage is representative of early neurulation  
123 and within the critical period for development of HPE.<sup>2,3</sup> Studies were conducted in strict  
124 accordance with the recommendations in the *Guide for the Care and Use of Laboratory Animals*  
125 of the National Institutes of Health. The protocol was approved by the University of Wisconsin-  
126 Madison School of Veterinary Medicine Institutional Animal Care and Use Committee (protocol

127 number G005396). CD-1 mice (*Mus musculus*) were purchased from Charles River and  
128 C57BL/6J mice from The Jackson Laboratory. Timed-pregnancies were established as  
129 previously described.<sup>4</sup> Embryos were dissected at GD8.25 and fixed overnight in 4%  
130 paraformaldehyde. *In situ* hybridization (ISH) was conducted on whole C57BL/6J embryos or 50  
131  $\mu\text{m}$  sections cut from CD-1 embryos with a vibrating microtome in the transverse plane along the  
132 anterior-posterior axis. ISH was conducted as previously described.<sup>5</sup>

133

134 **Urogenital: mouse and human immunostaining.** Human lower urinary tracts were obtained  
135 from the Joint MRC / Wellcome (MR/R006237/1) Human Developmental Biology Resource  
136 ([www.hdbr.org](http://www.hdbr.org)) under an approved University of Wisconsin-Madison IRB protocol (2016-  
137 0449). C57BL/6J mouse lower urinary tracts were obtained under a University of Wisconsin-  
138 Madison approved ACUC protocol (protocol number G005396). Tissues were embedded in  
139 paraffin and stained with antibodies against PPP1R12A (Thermo Scientific PA579857, 1:250),  
140 PPP1R12B (Sigma HPA024171, 1:250), CDH1 (BD Transduction Labs 610181, 1:250) and with  
141 DAPI (nuclei) using an established method.<sup>6</sup> Mouse results are representative of three  
142 independent mice per group and human results are representative of one per group.

143

#### 144 **DNA Sequence and Analysis Methods**

145

146 National Institutes of Health: DNA samples from study participants underwent exome  
147 sequencing at the National Intramural Sequencing Center (NISC) as previously described.<sup>7</sup> The  
148 mean read depth for each sample was 79.8. Copy number variation (CNV) prediction from  
149 exome data was done using the XHMM (eXome-Hidden Markov Model) caller.<sup>8</sup> We used

150 GATK to generate the depth of coverage statistics required for XHMM from the BAM files of  
151 our HPE cohort and a control set. GATK output was then run through the XHMM pipeline,  
152 generating a VCF file containing each predicted CNV. We then annotated each CNV for genes  
153 contained and cytogenetic region using Annovar. All probands were first searched for four  
154 common genes known to cause HPE: *SHH* (MIM: 600725) on 7q36, *ZIC2* (MIM: 603073) on  
155 13q32, *SIX3* (MIM: 603714) on 2p21, and *TGIF* (MIM: 602630) on 18p11.3 using Sanger  
156 sequencing as recommended.<sup>9</sup> With the goal of new gene discovery, minimizing false positives,  
157 and sacrificing sensitivity, the discovery cohort was filtered with stringent criteria including *de*  
158 *novo* inheritance in genes intolerant of variation,<sup>10</sup> variant absence in the ExAC database,<sup>10</sup> and  
159 Combined Annotation-Dependent Depletion (CADD) scores above 20.<sup>11</sup> Variants that met these  
160 criteria were considered deleterious. A total of 101 trios affected by holoprosencephaly (proband,  
161 father, and mother) were sequenced.

162

163 Technical University of Munich: DNA was extracted from peripheral blood using the Genra  
164 Puregene Blood Kit (Qiagen, Hilden, Germany) according to the manufacturer's instructions. Trio  
165 exome sequencing (ES) was performed using a Sure Select Human All Exon 60 Mb V6 Kit  
166 (Agilent) and a NovaSeq 6000 (Illumina) as previously described.<sup>12</sup> Mitochondrial DNA was  
167 derived from off-target exome reads as previously described.<sup>13</sup> Reads were aligned to the human  
168 reference genome (UCSC Genome Browser build hg19) using Burrows-Wheeler Aligner  
169 (v.0.7.5a). Detection of single-nucleotide variants and small insertions and deletions (indels) was  
170 performed with SAMtools (version 0.1.19). ExomeDepth was used for the detection of copy  
171 number variations (CNVs).<sup>14</sup> For the analysis of *de novo*, autosomal dominant and mitochondrial  
172 variants, only variants with a minor allele frequency (MAF) of less than 0.1% in the in-house



173 database of the Helmholtz center Munich containing over 18,000 exomes were considered. For the  
174 analysis of autosomal recessive and X-linked variants (homozygous, hemizygous or compound  
175 heterozygous) only variants with a MAF of less than 1.0% were considered.

176  
177 Children's National Hospital: A cohort of 300 samples, belonging to 94 families with a variety of  
178 syndromic or isolated DSD conditions was sequenced. Whole genome sequencing at an average  
179 30x coverage was performed on a HiSeqX instrument at the Baylor facility under the Gabriella  
180 Miller Kids First Initiative XO1 mechanism (<https://commonfund.nih.gov/kidsfirst/x01projects>).  
181 Targeted search for exonic variants in *PPP1R12A* analysis was performed using both the Genoox  
182 platform (<https://www.genoox.com/>) and the Broad Institute's *Seqr* software  
183 (<https://www.seqr.broadinstitute.org/>).

184  
185 GeneDx: Limited availability of detailed commercial practices regarding exome processing and  
186 analysis. Test info sheet for XomeDx accessible through their public website for review  
187 (<https://www.genedx.com/>).

188

## 189 **Supplemental References**

190

- 191 1. Geng, X., and Oliver, G. (2009). Pathogenesis of holoprosencephaly. *J Clin Invest* 119, 1403-  
192 1413.
- 193 2. Heyne, G.W., Melberg, C.G., Doroodchi, P., Parins, K.F., Kietzman, H.W., Everson, J.L.,  
194 Ansen-Wilson, L.J., and Lipinski, R.J. (2015). Definition of critical periods for Hedgehog

195 pathway antagonist-induced holoprosencephaly, cleft lip, and cleft palate. *PLoS One* 10,  
196 e0120517.

197 3. Heyne, G.W., Everson, J.L., Ansen-Wilson, L.J., Melberg, C.G., Fink, D.M., Parins, K.F.,  
198 Doroodchi, P., Ulschmid, C.M., and Lipinski, R.J. (2016). *Gli2* gene-environment interactions  
199 contribute to the etiological complexity of holoprosencephaly: evidence from a mouse model.  
200 *Dis Model Mech* 9, 1307-1315.

201 4. Heyne, G.W., Plisch, E.H., Melberg, C.G., Sandgren, E.P., Peter, J.A., and Lipinski, R.J.  
202 (2015). A Simple and Reliable Method for Early Pregnancy Detection in Inbred Mice. *J Am*  
203 *Assoc Lab Anim Sci* 54, 368-371.

204 5. Everson, J.L., Fink, D.M., Yoon, J.W., Leslie, E.J., Kietzman, H.W., Ansen-Wilson, L.J.,  
205 Chung, H.M., Walterhouse, D.O., Marazita, M.L., and Lipinski, R.J. (2017). Sonic hedgehog  
206 regulation of *Foxf2* promotes cranial neural crest mesenchyme proliferation and is disrupted in  
207 cleft lip morphogenesis. *Development* 144, 2082-2091.

208 6. Abler, L.L., Keil, K.P., Mehta, V., Joshi, P.S., Schmitz, C.T., and Vezina, C.M. (2011). A  
209 high-resolution molecular atlas of the fetal mouse lower urogenital tract. *Dev Dyn* 240, 2364-  
210 2377.

211 7. Kruszka, P., Uwineza, A., Mutesa, L., Martinez, A.F., Abe, Y., Zackai, E.H., Ganetzky, R.,  
212 Chung, B., Stevenson, R.E., Adelstein, R.S., et al. (2015). Limb body wall complex, amniotic  
213 band sequence, or new syndrome caused by mutation in IQ Motif containing K (IQCK)? *Mol*  
214 *Genet Genomic Med* 3, 424-432.

215 8. Fromer, M., Moran, J.L., Chambert, K., Banks, E., Bergen, S.E., Ruderfer, D.M., Handsaker,  
216 R.E., McCarroll, S.A., O'Donovan, M.C., Owen, M.J., et al. (2012). Discovery and statistical

217 genotyping of copy-number variation from whole-exome sequencing depth. *Am J Hum Genet*  
218 91, 597-607.

219 9. Kruszka, P., Martinez, A.F., and Muenke, M. (2018). Molecular testing in holoprosencephaly.  
220 *Am J Med Genet C Semin Med Genet* 178, 187-193.

221 10. Lek, M., Karczewski, K.J., Minikel, E.V., Samocha, K.E., Banks, E., Fennell, T., O'Donnell-  
222 Luria, A.H., Ware, J.S., Hill, A.J., Cummings, B.B., et al. (2016). Analysis of protein-coding  
223 genetic variation in 60,706 humans. *Nature* 536, 285-291.

224 11. Kircher, M., Witten, D.M., Jain, P., O'Roak, B.J., Cooper, G.M., and Shendure, J. (2014). A  
225 general framework for estimating the relative pathogenicity of human genetic variants. *Nat*  
226 *Genet* 46, 310-315.

227 12. Kremer, L.S., Bader, D.M., Mertes, C., Kopajtich, R., Pichler, G., Iuso, A., Haack, T.B.,  
228 Graf, E., Schwarzmayr, T., Terrile, C., et al. (2017). Genetic diagnosis of Mendelian disorders  
229 via RNA sequencing. *Nat Commun* 8, 15824.

230 13. Griffin, H.R., Pyle, A., Blakely, E.L., Alston, C.L., Duff, J., Hudson, G., Horvath, R.,  
231 Wilson, I.J., Santibanez-Koref, M., Taylor, R.W., et al. (2014). Accurate mitochondrial DNA  
232 sequencing using off-target reads provides a single test to identify pathogenic point mutations.  
233 *Genet Med* 16, 962-971.

234 14. Plagnol, V., Curtis, J., Epstein, M., Mok, K.Y., Stebbings, E., Grigoriadou, S., Wood, N.W.,  
235 Hambleton, S., Burns, S.O., Thrasher, A.J., et al. (2012). A robust model for read count data in  
236 exome sequencing experiments and implications for copy number variant calling.  
237 *Bioinformatics* 28, 2747-2754.

238
